# Supplementary material for: Transcriptomic and Functional Approaches Unveil the Role of tmRNA in Zinc Acetate Mediated Levofloxacin Sensitivity in Helicobacter pylori
Source: PubMed Central journal article supplement (PMC9769675; doi:10.1128/spectrum.01152-22), 2022-11-10
Supplement: spectrum.01152-22-s0001.pdf [file spectrum.01152-22-s0001.pdf]

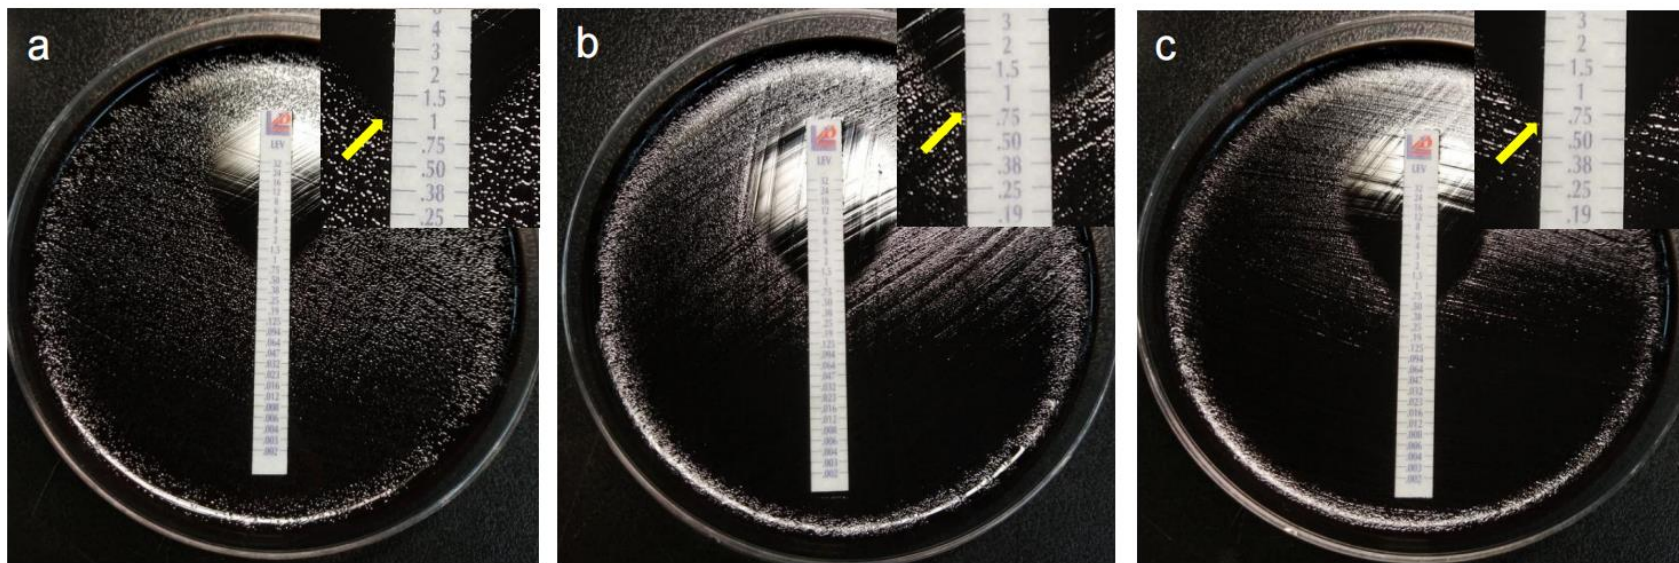

Control: 1.0-1.5 µg/ml

Polaprezinc: 0.75-1.0 µg/ml

Zinc acetate: 0.5-0.75 µg/ml

**Supplementary Figure 1.** Effects of zinc compounds on the sensitivity of *H. pylori* NCTC 11637 to levofloxacin. The MIC of levofloxacin was (a) 1.0-1.5 µg/ml in control group, (b) 0.75-1.0 µg/ml in polaprezinc group, (c) 0.5-0.75 µg/ml in zinc acetate group.

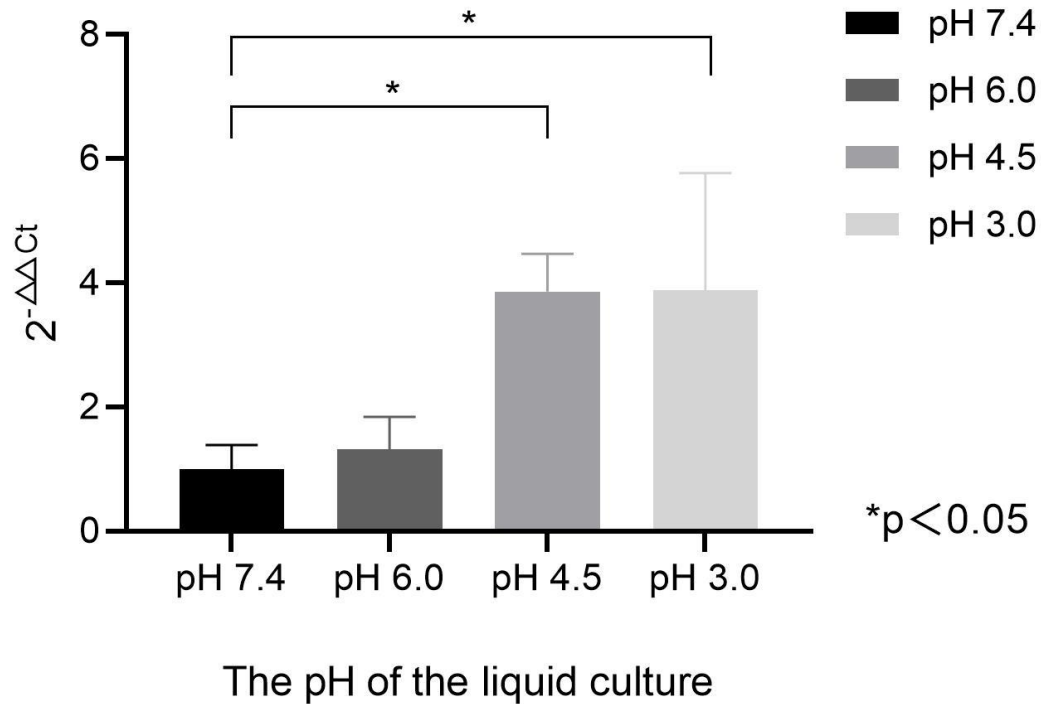

**Supplementary Figure 2.** Changes of *ssrA* expression in NCTC 11637 after incubated in acidity gradient liquid media evaluated by qRT-PCR.  $2^{-\Delta\Delta Ct}$  was used to evaluate the difference of gene expression. Error bars indicate standard deviation.

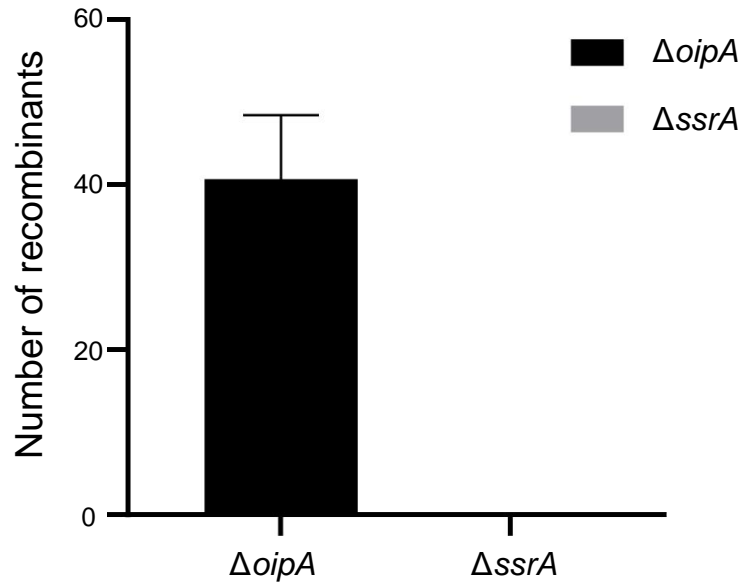

**Supplementary Figure 3.** The number of recombinants obtained for NCTC 11637 following introduction of the plasmids that knock out *ssrA* and *oipA*.  $\Delta oipA$  was used as a positive control. Recombinants were the colonies obtained after transformation and selected on kanamycin-contained plates. The vertical axis corresponds to the number of recombinants.
